1

## 2 **About a tetraploid ivy in Sicily: from autochthonous *Hedera* to** 3 **horticultural-invasive-hybrid package?**

4 ALAIN FRIDLENDER<sup>1</sup> & N. PECH<sup>2</sup>

5 1 - Faculté des Sciences, Université d'Aix- Marseille AMU, 3 Place Victor Hugo, 13 003 Marseille, France.

6 2 – Institut Pytheas – Observatoire des Sciences de l'Univers, Université d'Aix- Marseille AMU, 3 Place Victor  
7 Hugo, case 36, 13 003 Marseille, France.

8

9 Corresponding author: Alain Fridlender, [alain.fridlender@univ-amu.fr](mailto:alain.fridlender@univ-amu.fr)

10 Running title: Tetraploid *Hedera* in Sicily: native or invasive?

11

### 12 **Abstract**

13 In Sicily, *H. helix* is the unique known native species whereas *H. helix* subsp. *poetarum* is  
14 putatively naturalized in some forests and *H. canariensis* cultivated in various urban's garden.  
15 Trichome morphology and genome size of some ivies from various west Mediterranean  
16 forests were compared to Sicilian ones. Ivies from southern Italy, continental France, Corsica  
17 and Mallorca belong to typical European diploid stellate trichomes *Hedera helix*. Hexaploid  
18 ivies from southern Spain have been identified as native *H. iberica*. Contrariwise, Sicilian  
19 ivies studied are related to western European *H. hibernica* (tetraploids with stellate  
20 trichomes). Is *H. helix* the most widespread and indigenous ivy in Sicily? Therefore, it would  
21 be the first time that tetraploid would be reported in Sicily where it could possibly correspond  
22 to an unnoticed autochthonous taxon. However, our results let us think it rather represents an  
23 invasive which impact on this island rich in endemic species could be considerable.

24

25 **Keywords:** *Hedera*, genome size, trichome morphology, invasive, Sicily

26

### 27 **1. Introduction**

28 Species belonging to Eurasian genus *Hedera* L. (Araliaceae) are notoriously difficult to  
29 identify due to high leaves polymorphism caused by environmental conditions and  
30 heteroblasty: ontogenic change from juvenile to adult leaves (Robbins 1957, 1960; Frydman  
31 et al. 1973a, 1973b). As heteroblastic development (partially under influence of the hormonal  
32 production from roots and buds) is reversible (transition from adult to juvenile), we may find  
33 a great variety of leaves shape within one individual and all along one stem and its branching.

34

35

36According to authors, *Hedera* Eurasian genus would include 12 to 16 taxa (Lum and Maze  
371989; McAllister and Rutherford 1990; Vargas et al. 1999; Ackerfield 2001). Thanks to  
38trichome morphology - stellate versus scale-like- combined with ploidy levels, recent works  
39allow us to better characterize them (Table 1).

40

41The five easternmost species of the genus area distribution present scale like trichomes:  
42*Hedera cypria* McAllister (Cyprus), *H. colchica* (K. Koch) K. Koch (South and Est Black Sea  
43territories), *H. pastuchovii* Woronow (West and South Caspian Sea territories), *H. nepalensis*  
44K. Koch. (Afghanistan to China), *H. rhombea* (Miq.) Bean. (Korean peninsula, Japan,  
45Taiwan) (Figure 1a).

46*Hedera helix* L., a diploid stellate trichome plant is present in all European countries: within  
47numerous infraspecific taxa described, the most noticed are *H. helix* subsp. *rhizomatifera*  
48McAllister in southern Spain and *H. helix* subsp. *caucasigena* Kleop. in Turkey and Caucasus.  
49Native *H. helix* s.l. distribution remains unclear in particular where several species and  
50infraspecific taxa live in sympatry. In Ireland and in Western part of Great Britain, France and  
51Iberian Peninsula grows *H. hibernica* (G. Kirchner) Bean. *H. helix* s.l. and *H. hibernica* are  
52invasive species in North America, Argentine, Chile, Australia, New Zealand...

53

54South westernmost part of *Hedera* distribution presents the highest ivies diversity. Each one  
55among the three Atlantic archipelagos possess endemic species: *H. canariensis* Willd., *H.*  
56*maderensis* K. Koch ex A. Rutherf, *H. azorica* Carr. In North Africa, the genus is represented  
57by two endemics species with scale-like trichomes (*H. maroccana* McAllister, *H. algeriensis*  
58Hibberd). Five taxa are known in Iberian Peninsula: three stellate trichomes species (*H. helix*  
59L. subsp. *helix*, *H. helix* subsp. *rhizomatifera*, *H. hibernica*) and two scale-like trichomes taxa  
60(*H. iberica* (Mc Allister) Ackerfield & J. Wen [= *H. maderensis* K. Koch ex A. Rutherf. subsp.  
61*iberica* Mc Allister], and locally naturalized *H. maroccana*).

62

63In the field, it is not so easy to identify ivies! Leaves shape varies greatly according to  
64environmental conditions (light, humidity), it is different on horizontally and vertically  
65crawling shoot -youth leaves much more cut than adult ones. Finally, to observe trichomes, it  
66is necessary to use a more powerful magnifying glass than the ones usually available on the  
67ground. Trichomes are abundant in apex, more dispersed on young leaves and usually absent

68on mature leaves. Moreover, trichomes fall easily when touched (harvesting, herbarium  
69handling...).

70

71In addition, in Europe ivies are largely cultivated for a long time and offered for sale in  
72nursery since the 18th century: *H. hibernica*, *H. maroccana*, *H. algeriensis* and *H. colchica*  
73have now commonly escaped from garden.

74Furthermore, numerous hybrid and cultivar ivies are introduced, sometimes escape from  
75gardens and remain even more difficult to identify. Triploid clones (most of them sterile)  
76apparently do not exist in native European population but they are sold in the markets and  
77escape in the field. Triploids and particularly allotetraploids may appear spontaneously in  
78areas where introduced populations come into contact with native ivies or other previously  
79naturalized ivies cultivars. Hybrids individuals appear to be more and more common in  
80Europe (Marshall et al. 2017).

81Despite the huge diversity of phenotype and ploidy levels, botanists, naturalists or ecologists  
82name generally the ivies indistinctly under the binomial *Hedera helix* L. In this study, we use  
83cytometric analyses and trichomes morphology to 1) better identify ivies collected from  
84western Mediterranean islands, 2) point out taxonomic inconsistencies and 3) highlight the  
85importance of accurate species identification in a context of global change.

86

## 87 **2. Material and methods**

### 88 **2.1. Plants studied**

89The origins and numbers of the plants for each of the studied population are shown in Table 2.  
90Cytometric analyses were performed on one Iberian population of *Hedera iberica* (Figure 2)  
91and various *Hedera* cf. *helix* look like plants from three continental populations (Italy, France)  
92and three insular origins: Mallorca, Corsica and Sicily (Figure 1b).

### 93 **2.2. Genome size analysis by flow cytometry**

94The analyzed leaves were collected in the wild and immediately sent to the laboratory. The  
95total nuclear DNA amount was assessed by flow cytometry (Marie and Brown 1993;  
96Fridlender et al. 2002). For Iberian ivies, we used *Artemisia arborescens* L. from Crete ( $2C =$   
9711.43 pg) as an internal standard, *Petunia hybrida* cv PxPc6 ( $2C = 2.85$  pg) for Sicilian ivies  
98and for all other plants *Lycopersicon esculentum* ( $2C = 2.01$  pg). Leaves of the internal  
99standard and *Hedera* were chopped using a razor blade in a plastic Petri dish with 600  $\mu$ l of  
100Galbraith nucleus-isolation buffer (Galbraith et al. 1983) containing 0.1% (w/v) Triton X-

101100, supplemented with 10 mM sodium metabisulphite, 1% (w/v) polyvinylpyrrolidone  
10210,000 and RNase (2.5 U/ml). The suspension was filtered through 50 µm nylon mesh. The  
103nuclei were stained with 75 µg/ml propidium iodide, a specific DNA fluorochrome  
104intercalating dye, and kept 15 min at 4°C. DNA content of 5,000–10,000 stained nuclei was  
105determined for each sample using a cytometer (CyFlow SL3, Partec, Munster, Germany). The  
106total 2C DNA value was calculated using the linear relationship between the fluorescent  
107signals from stained nuclei of the *Hedera* individuals and the internal standard. The mean  
108value was calculated from measurements of samples comprising 1 to various individuals  
109according to populations (Table 2).

### 110 2.3. *Statistical analysis*

111The relationship between ploidy  $P$  and 2C DNA content  $x$  for known ploidy level was  
112modeled considering the following quadratic model:  $P_i = a + b x_i + c x_i^2 + E_i$ .  $E_i$  terms are  
113supposed to be identically and independently distributed according to a centered Gaussian  
114distribution whose standard deviation is indicated by  $\sigma$ . Significance of parameters was tested  
115using classical t-test. Statistical analyses were performed using R (R Core Team, 2019).

### 116 2.4. *Trichomes*

117Trichomes from young leaves, apex and shoots from dried specimens were observed in SEM  
118according to classical microscopical protocol. Measurements of various parameters (arms  
119number, length of fused arms, length of free part of arms) from 25 trichomes from Sicily and  
12015 from Spain were done, based on Lume and Maze (1989).

121

## 122 3. Results

### 123 3.1. *Trichomes morphology*

124Andalusian ivies have leaves shape with terminal leaf lobe much longer than the others  
125(Figure 2) and scale-like trichomes (Figure 3a-b). Trichomes from young dried leaves from  
126Los Barrios ivy population have 8-14[17] arms ( $m = 9.2 \pm 1.5$ ) fused in a 48-66 µm central  
127disc diameter ( $m = 55.2 \pm 7.8$ ). Arms free length part varies from 55 to 200 µm ( $m = 118.7 \pm$   
12840.7) with basal width of 14-27 µm ( $m = 20.4 \pm 3.49$ ). Plants do not present difficulty of  
129identification based on trichomes morphology (Ackerfield & Wen 2002) and limbs shape  
130(Valcàrcel et al. 2002): all the individuals correspond to endemic *H. iberica* (McAllister)  
131Ackerfield & J. Wen.

132

133Collected plants from Mallorca, Corsica, France and southern Italy have classical *Hedera*  
134*helix* leaves polymorphism and stellate trichomes.

135

136Trichomes from Sicilian plants seem more polymorphic most of them are stellate type but  
137some are more or less rotate (scale-type related). Unfortunately, most of them fell and  
138remained very scarce in leaves. They have 5-8[10] arms ( $m = 7.4 \pm 1.37$ ); practically footless  
139(Figure 3f), central disc (welding area of arms) often reduced ( $26\mu\text{m}!$ ), average disc diameter  
140 $m = 56.6 \pm 14.2 \mu\text{m}$ . The free parts of the different arms of the same trichome are of variable  
141lengths: arm length comprised between 63 and 354  $\mu\text{m}$  ( $m = 191 \pm 81.2$ ) and base width  $m =$   
142 $18.7 \pm 5.62 \mu\text{m}$ . Some arms are partly fused (Figure3d) or bifid beyond the central disc.

143

144Plants from Sicily present stellate type trichomes but majorities of them are more or less  
145adpressed (Figure 3c) and then would not match with *Hedera helix* (Ackerfield 2001).  
146Moreover, biometric data match better with the ones of *H. hibernica* than *H. helix*: arms more  
147numerous and shorter (Lum & Maze 1989). Then, all these characters do not allow us to  
148clearly identify species.

149

### 150 **3.2. Doubts and controversies about genome size**

151Ivies genomes size presents a good correlation with chromosomes numbers with estimated  
152relationship  $P_i = 0.916 + 0.920 x + 0.077 x^2$  (adjusted  $R^2 = 0.995$ ,  $P < 2.2 \times 10^{-16}$ ). The  
153relationship estimated from our data is mainly linear with a slightly quadratic component  
154(Figure 4). All parameters depart significantly from zero.

155

156Our 2C DNA values (Table 2) match well with the data published up to now (Green et al.  
1572013, see also Figure 4) when considering 2x to 6x range of ploidy. Based on our model, the  
158x genome size given by Green et al. (2013) cannot be accurately predicted.

159

160The “*Hedera helix*” 2C value (8.18 pg) given by Marie & Brown (1993) come from an  
161unnamed garden ivy collected in Gif-sur-Yvette (France, Essone), « going to the lab» (S.  
162Brown, personal communication). Then, analyzed leaves belong to one of the many ivies  
163cultivars that are grown abundantly in the surrounding of Paris region. Moreover, internal  
164standard used (*Petunia hybrida*, 2C = 2.85 pg) is not very suitable to measure precisely such  
165large genome. Then this value is not exceptional nor atypical as stated by Obermayer and  
166Greilhuber (2000) but corresponds probably to an hexaploid cultivar (ca 9 pg). Flow

167 cytometry is very suitable to estimate ploidy level in *Hedera* genus as triploid of recent  
168 hybridization between *H. helix* and *H. hibernica* have a 2C DNA = ca 4.5 pg (Figure 4). On  
169 the other hand, *H. colchica*  $2n = 8x = 10.3-10.8$  pg (Zonneveld et al. 2005; Green et al. 2013)  
170 is slightly different from this pattern, while we would expect a 2C genome size of about 12pg  
171 unless plant samples analyzed could be heptaploid hybrids.

172

#### 173 **4. Discussion**

174

175 Based on trichomes morphology ivies from France, Italy, Corsica and Balears are *Hedera*  
176 *helix*, DNA amount confirms that they are diploid. Likewise, leaves of Andalusian ivy have an  
177 elongated central leaflet, scale-trichomes and plants are hexaploid: they correspond without  
178 ambiguity to *H. iberica*.

179

180 The dimensions of trichomes vary from an author to another (Lum and Maze 1989; Ackerfield  
181 2001; Valcarcel 2002), which is not surprising due to their great variability on the same  
182 branch. Besides in *H. helix* and *H. hibernica* there are many trichomes with intermediate  
183 aspects (Valcarcel et al. 2002).

184 Trichomes morphology does not allow to unambiguously name the plants collected in  
185 Madonie and Alcamo forests as one of the three known Sicilian species. In fact, trichomes  
186 morphology match better to those of *H. hibernica*: arms shorter, more numerous and  
187 adpressed. On the other hand, they are tetraploids. On this point, Sicilian ivy do not  
188 correspond to any known Sicilian ivies putatively all diploids: native *H. helix* subsp. *helix*,  
189 locally naturalized *Hedera helix* subsp. *poetarum* Nyman or cultivated *Hedera canariensis*  
190 (Giardina 2007).

191

192 Sicilian ivies leaves look like to *H. helix* ones and most of trichomes are stellate however they  
193 are slightly adpressed. Then, if we combine these characters, ivies collected in the  
194 northwestern forests belong to *H. hibernica* as the other known tetraploid ivy species (*H.*  
195 *algeriensis*) have scale trichomes (Table 1). While diploids and hexaploids are known  
196 throughout *Hedera* genus range, the two tetraploids ivies are confined to the European  
197 Atlantic area and Northern Algeria (Figure 1b).

198

199From these observations, it is likely that Sicilian ivies are related to *H. hibernica*. However,  
200we cannot also exclude that it would be a native tetraploid with a great biogeographical  
201interest (cryptic apo endemic).

202Moreover, it could well be a hybrid or a naturalized *H. hibernica* that would have been  
203unnoticed on the island. Of the two populations analyzed in Sicily, none corresponds to *H.*  
204*helix* yet reported as common over a large part of the island.

205It seems unlikely that this plant is introduced in Madonie (relatively far from urban centers),  
206but Alcamo forest is largely anthropized. *H. hibernica* has been cultivated for a long time  
207everywhere and has become invasive in various part of northern hemisphere.

208In the highly probable case of a past introduction, field studies should be accompanied by  
209examination of the herbarium samples in order to establish the age of the naturalization. In  
210addition, it seems essential to identify again all the ivies previously reported in the literature:  
211obviously several mentions of *H. helix* correspond to putatively *H. hibernica* (taxonomic  
212confusions). It will allow establishing the status of each of these two taxa.

213

214

215Widely selected by horticulturists and gardeners, ivies have been the subject of a significant  
216trade since at least the beginning of the 18th century. Since these plants are cheap and easy to  
217grow, it is not surprising that they have become invasive. Indeed, it is well demonstrated that  
218selling price and availability on the market are important factors in their dissemination in the  
219field (Dehnen-Schmutz et al. 2007; Pemberton et al. 2009). In North American, ivies began to  
220naturalize on the East coast of the continent in the 1870s and about 60 years later in the West  
221coast quickly becoming invasive with significant ecological consequences on forest dynamics  
222(Clarke et al. 2006; Green et al. 2013; Strelau et al. 2018).

223

224*Hedera* are abundant in various habitats in Europe but difficult to identify, that is why the  
225arrival of allochthonous ivies in natural populations passes unnoticed. In the Mediterranean,  
226the situation appears to be even more complex as native taxa possess all the known levels of  
227ploidy.

228On the French Mediterranean coast, *H. helix* is often located, since it requires relatively mesic  
229forests. English ivy (- or Irish ivy - commercial name for several horticultural plants  
230principally selected from *H. hibernica*) is one of the commonest ivies on the market, most  
231sold in urban landscape for decorative purposes but also for soil stabilization and ground  
232cover. Unfortunately, generalized urbanization and development of road infrastructures

233 facilitate the spreading of those cultivated ivies. It allows contact between introduced ivies  
234 with the natural stands of *H. helix* so that in certain sectors (near cities and residential areas in  
235 particular) the ivies become difficult to characterize (mixture of native species, cultivars and  
236 hybrids). This is patent for example in Southeastern France (see Marseille Table2), Liguria,  
237 Toscana, Lombardia and Lazio where *H. hibernica* s. l. is well implanted around urban centers.  
238 The islands endure the same treatment: in Sicily, ivy cultivars (scale and stellate groups) are  
239 widely planted in archaeological sites! The recent expansion of *Xylella fastidiosa* in Corsica,  
240 introduced from the United States via horticulturists and intensive agricultural practices (Janse  
241 and Obradovic 2010) highlights the massive horticultural imports plants. In Mallorca, the  
242 seaside resorts lead to a standardized landscaping and subsequent horticultural plants  
243 introduction. If in those two islands *H. helix* remains strongly present in natural areas, in  
244 Sicily the ivies of both sampled forests do not correspond to *H. helix*, but to a tetraploid ivy.  
245  
246 These observations are part of a general process in which invasives colonize primarily the  
247 coastal areas and low altitudes (especially if they are strongly anthropized), prior to penetrate  
248 native habitat. The polyploids (in particular 4x) appearing, in addition, over represented  
249 (Verlaque et al. 2002).

250 In Lebanon, where the only reported native species is *H. helix* (Mouterde 1970); we also  
251 noticed various populations of ivies with stellate adpressed trichomes (scale trichomes ivies  
252 are largely cultivated as ornamental from lowland up to 1200m). Then it would be necessary  
253 to clarify if it corresponds to a particular Mediterranean taxon or if it also belongs to this mix  
254 horticultural-invasive-hybrid package.

255

256 Replacement of a mesic native species (like *H. helix*) by a cultivar-invasive-hybrid  
257 consortium that may develop in drier ecosystems may have some ecological consequences.  
258 Rarefaction of wet habitat taxa to the detriment of xerophytics plants is part of a generalized  
259 Mediterranean ecosystems transformation (even putatively well-preserved ones like “relict”  
260 forest or protected areas). It is all the more devious as it goes unnoticed.

261

262 Therefore, fine ivies systematic study is necessary in order to precisely characterize  
263 autochthonous species and understand mechanisms of formation and acclimation of those new  
264 taxonomic entities in the field. These biological invasions contribute to global changes  
265 (change and probable loss of biodiversity...) of which they are powerful indicators. Indeed, if  
266 well identified, they appear as valuable markers of current changes.



267

268

269

## 270 Acknowledgements

271

272 We thank Spencer Brown (CNRS - Gif sur Yvette) and Nicolas Brouilly (CNRS - Luminy) for  
273 their help in flow cytometry and SEM; Fabrice Paraque and André Gilles for English and  
274 manuscript revision.

275

## 276 References

277

278 Ackerfield J. 2001. Trichome morphology in *Hedera* (Araliaceae). *Edinburgh J. Bot.*, 58(2):

279 259-267.

280 Ackerfield J. Wen J. 2002. A morphometric analysis of *Hedera* L. (the ivy genus, Araliaceae)

281 and its taxonomic implications. *Adansonia ser.*3, 24(2): 197-212.

282 Clarke MM, Reichard SH, Hamilton CW. 2006. Prevalence of different horticultural taxa of

283 ivy (*Hedera* spp., Araliaceae) in invading populations. *Biological Invasions* 8:

284 149-157.

285 Dehnen-Schmutz K, Touza J, Perrings C, Williamson M. 2007. A century of the ornamental

286 plant trade and its impact on invasion success. *Diversity and Distribution* 13: 527-

287 534.

288 Fridlender A, Brown S, Verlaque R, Crosnier MT, Pech N. 2002. Cytometric determination of

289 genome size in *Colchicum* species (Liliales, Colchicaceae) of the western

290 Mediterranean area. *Plant Cell Rep.* **21**: 347-352.

291 Frydman VM, Wareing PF. 1973a. Phase change in *Hedera helix* L. II The possible role of

292 roots as a source of shoot gibberellin-like substances. *Journal of Experimental*

293 *Botany* 24(83): 1139-1148.

294 Frydman VM, Wareing PF. 1973b. Phase change in *Hedera helix* L. III The effects of

295 gibberellins, abscisic acid and growth retardants on juvenile and adult ivy. *Journal*

296 *of Experimental Botany* 25(85): 420-429.

297 Galbraith DW, Harkins KR, Maddox JM, Ayres NM, Sharma DP. 1983. Rapid Flow

298 Cytometric Analysis of the Cell Cycle in Intact Plant Tissues. *Science* 220(4601):

299 1049-1051.

300 Giardina G, Raimondo FM, Spadaro V. 2007. A catalogue of plants growing in Sicily.

301 *Boccone* 20, 582p.

- 302 Green AF, Ramsey TS, Ramsey J. 2011. Phylogeny and biogeography of Ivies (*Hedera* spp.,  
303 Araliaceae) a polyploid complex of woody vines. *Systematic Botany* 36(4):1114-  
304 1127.
- 305 Green AF, Ramsey TS, Ramsey J. 2013. Polyploidy and invasion of English ivy (*Hedera* spp.,  
306 araliaceae) on North American forests. *Biol. Invasions* 15: 2219-2241
- 307 Grivet D, Petit RJ, 2002. Phylogeography of the common ivy (*Hedera* sp.) in Europe: genetic  
308 differentiation through space and time. *Molecular Ecology* 11: 1351-1362.
- 309 Janse JD, Obradovic A. 2010. *Xylella fastidiosa*: its biology, diagnosis, control and risks.  
310 *Journal of Plant Pathology* 92(supplement 1): 35-48.
- 311 Lume C, Maze J. 1989. A multivariate analysis of the trichomes of *Hedera* L. *Watsonia* 17:  
312 409-418.
- 313 Marie D, Brown S. 1993. A cytometric exercise in plant DNA histograms, with 2C values for  
314 70 species. *Biol. Cell* 78: 41-51.
- 315 Marshall RH, McAllister HA, Armitage JD. 2017. - A summary of hybrids detected in the  
316 genus *Hedera* (Araliaceae) with the provision of three new names. *New Journal of*  
317 *Botany* 7:2-8.
- 318 McAllister HA, Rutherford A. 1990. *Hedera helix* L. and *H. hibernica* (Kirchner) Bean  
319 (Araliaceae) in the British Isles. *Watsonia* 18:7-15.
- 320 Mousterde P. 1970. *Nouvelle Flore du Liban et de la Syrie*. Dar el Machre – Imprimerie  
321 catholique, Beyrouth, Tome 2, 720pp.
- 322 Obermayer R, Greilhuber J. 2000. Genome size in *Hedera helix* L. – a clarification.  
323 *Caryologia* 53(1):1-4.
- 324 Pemberton RW, Liu H. 2009. Marketing time predicts naturalization of horticultural plants.  
325 *Ecology* 90 (1): 69-80.
- 326 Plunkett M, Soltis DE, Soltis PS. 1996. Higher-level relationships of Apiales (Apiaceae and  
327 Araliaceae) based on phylogenetic analysis of rbcL sequences. *American Journal*  
328 *of Botany* 83(4): 499-515.
- 329 R Core Team 2019. R: A language and environment for statistical computing. R Foundation  
330 for Statistical Computing, Vienna, Austria. URL <https://www.R-project.org/>.
- 331 Robbins WJ. 1957. Gibberellic acid and the reversal of adult *Hedera* to a juvenile state.  
332 *American Journal of Botany* 44(9): 743-746.
- 333 Robbins WJ. 1960. Further observations on juvenile and adult *Hedera*. *American Journal of*  
334 *Botany* 47(6): 485-491.
- 335 Strelau M, Clements DR, Benner J, Prasad R. 2018. The biology of Canadian weeds: 157.  
336 *Hedera helix* L. and *Hedera hibernica* (G. Kirchen.) Bean. *Canadian Journal Plant*  
337 *Science* 98:1-18 DOI: [dx.doi.org/10.1139/cjps.2018-0009](https://doi.org/10.1139/cjps.2018-0009)

- 338Valcárcel V. 2002. Hacia un tratamiento taxonómico de las hiedras (*Hedera* L., Araliaceae)  
339 ibéricas: de caracteres morfológicos a moleculares. Anales Jardín Botánico de  
340 Madrid 59(2): 363-368.
- 341Valcárcel V, Fiz O, Vargas P. 2003. Chloroplast and nuclear evidence for multiple origins of  
342 polyploids and diploids of *Hedera* (Araliaceae) in the Mediterranean basin.  
343 Molecular Phylogenetics and Evolution 27:1-20.
- 344Valcárcel V, McAllister HA, Rutherford A, Mill RR. 2002. *Hedera* L. in Castroviejo et al.  
345 Flora Iberica Vol. X: 3-12.
- 346Valcárcel V, Vargas P. 2012. Phylogenetic reconstruction of key traits in the evolution of ivies  
347 (*Hedera* L.). Plant Systematic and Evolution DOI 10.2017/s00606-012-0734-1
- 348Vargas P, McAllister HA, Morton C, Jury SL, Wilkinson MJ. 1999. Polyploid speciation in  
349 *Hedera* (Araliaceae): phylogenetic and biogeographic insights based on  
350 chromosome counts and ITS sequences. Plant Systematic and Evolution 219:165-  
351 179.
- 352Verlaque R, Aboucaya A, Fridlender A. 2002. Les xenophytes envahissants en France:  
353 Ecologie, types biologiques et Polyploidie. Botanica Helvetica 112: 121-136.
- 354Zonneveld BJM, Leitch IJ, Bennett MD. 2005. First nuclear DNA amount in more than 300  
355 Angiosperms. Annals of Botany 96:229-244.
- 356
- 357
- 358
- 359
- 360
- 361
- 362
- 363
- 364

365 **Table 1** Ploidy level and trichome morphology of ivies (genus *Hedera* L., Araliaceae).

366

367

| Ploidy level       | Diploid<br>2n = 48                                                                                                                                                                                | Tetraploid<br>2n = 96 | Hexaploid<br>2n = 144                                                                  | Octoploid<br>2n = 192 |
|--------------------|---------------------------------------------------------------------------------------------------------------------------------------------------------------------------------------------------|-----------------------|----------------------------------------------------------------------------------------|-----------------------|
| Stellate trichomes | <i>H. azorica</i><br><i>H. helix</i> L. subsp. <i>helix</i><br><i>H. helix</i> subsp. <i>poetarum</i><br><i>H. helix</i> subsp. <i>rhizomatifera</i><br><i>H. helix</i> subsp. <i>caucasigena</i> | <i>H. Hibernica</i>   |                                                                                        |                       |
| Scale trichomes    | <i>H. maroccana</i><br><i>H. rhombea</i><br><i>H. nepalensis</i><br><i>H. canariensis</i>                                                                                                         | <i>H. algeriensis</i> | <i>H. cypria</i><br><i>H. pastuchovii</i><br><i>H. maderensis</i><br><i>H. iberica</i> | <i>H. colchica</i>    |

368

369 **Table 2** - Origin of studied populations of *Hedera* and Genome size (2C DNA in picograms  
370 ± standard deviation).

371 n = number of individuals measured. **Marseille:** plants were collected in the center of Massif  
372 des Calanques because on the edge of Calanques, ivies are a taxonomic mixture: most  
373 individuals are hybrid between native ivy and introduced cultivars, most of them issued from  
374 *H. algeriense* and “English ivy”.

375

| Population, putative species                                                                                                                                                                                                                                                                                                                                                                                                                                                                          | 2C DNA ± SD, in pg                                                                                       |
|-------------------------------------------------------------------------------------------------------------------------------------------------------------------------------------------------------------------------------------------------------------------------------------------------------------------------------------------------------------------------------------------------------------------------------------------------------------------------------------------------------|----------------------------------------------------------------------------------------------------------|
| <b>Mallorca</b> , Massanella mount: ca 1100m, <i>Hedera helix</i> L.                                                                                                                                                                                                                                                                                                                                                                                                                                  | 3.29 5 (n = 1)                                                                                           |
| <b>Corsica</b> , Figarella: in <i>Quercus ilex</i> wood, ca m, <i>Hedera helix</i> L.                                                                                                                                                                                                                                                                                                                                                                                                                 | 2.91 ± 0.05 (n = 3)                                                                                      |
| <b>France</b><br>Aix-en-Provence: Wet wood surrounding of Arc river, ca 150m, <i>Hedera helix</i> L.<br>Géménos: wet and fresh forest by Huveaune River ca. 200m; and Sainte Baume <i>Fagus sylvatica</i> forest, ca. 800m, <i>Hedera helix</i> L.<br>Marseille: Calanques, <i>Hedera helix</i> climbing on limestone rocks, ca 30, 80 and 150m, <i>Hedera helix</i> L.<br>Veyre-Monton: wet oak forest dominated by <i>Fraxinus excelsior</i> , <i>Salix fragilis</i> , 480m, <i>Hedera helix</i> L. | 3.12 ± 0.23 (n = 9)<br>2.98 ± 0.13 (n = 3)<br>3.25 ± 0.22 (n = 2)<br>3.10 ± 0.20 (n = 3)<br>3.59 (n = 1) |
| <b>Italy</b> , Potenza : Corleto Forest, ca. 800m, <i>Hedera helix</i> L.                                                                                                                                                                                                                                                                                                                                                                                                                             | 2.95 ± 0.01 (n = 2)                                                                                      |
| <b>France, Italy, Mallorca, Corsica</b> , <i>Hedera helix</i> L.                                                                                                                                                                                                                                                                                                                                                                                                                                      | 3.08 ± 0.22 (n = 15)                                                                                     |
| <b>Sicily</b> ,<br>Alcamo: forest above village, ca 350m, <i>Hedera</i> sp.<br>Madonie: forest at Piano Zuccì, ca. 1100m, <i>Hedera</i> sp.                                                                                                                                                                                                                                                                                                                                                           | 5.83 ± 0.06 (n = 7)<br>5.82 ± 0.08 (n = 4)<br>5.85 ± 0.03 (n = 3)                                        |
| <b>Spain</b> , Los Barrios, <i>Quercus suber</i> forest, ca. 50 m, <i>H. iberica</i>                                                                                                                                                                                                                                                                                                                                                                                                                  | 9.21 ± 0.17 (n = 5)                                                                                      |

376

377

378

379 **Figure 1a**

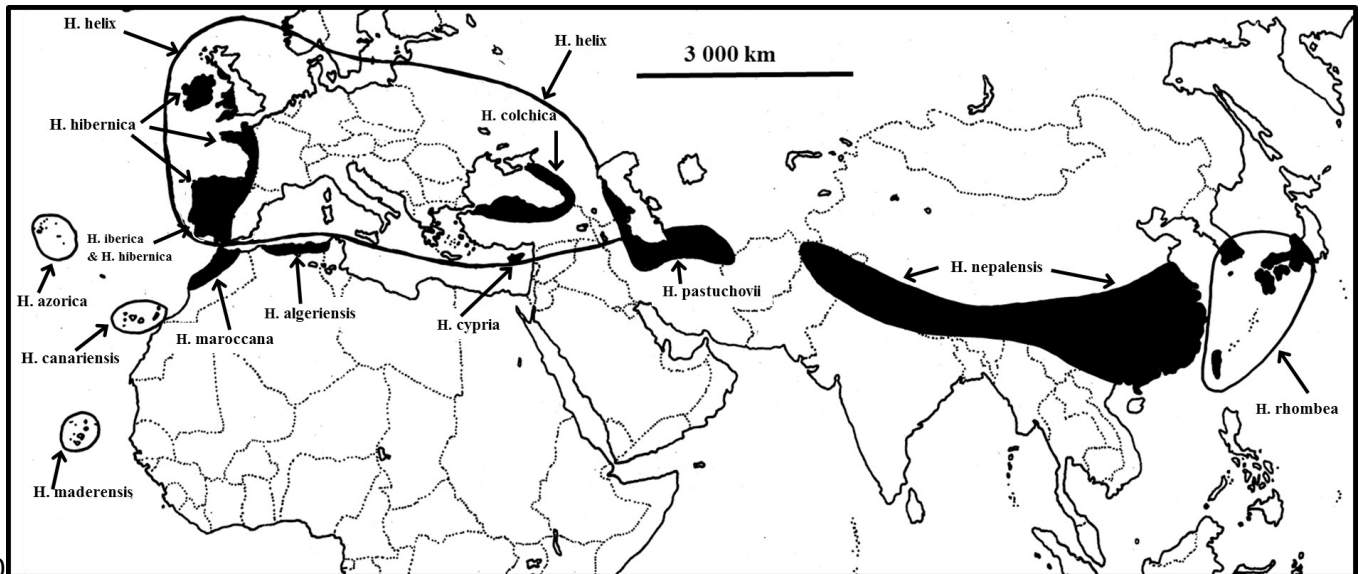

381 **Figure 1b**

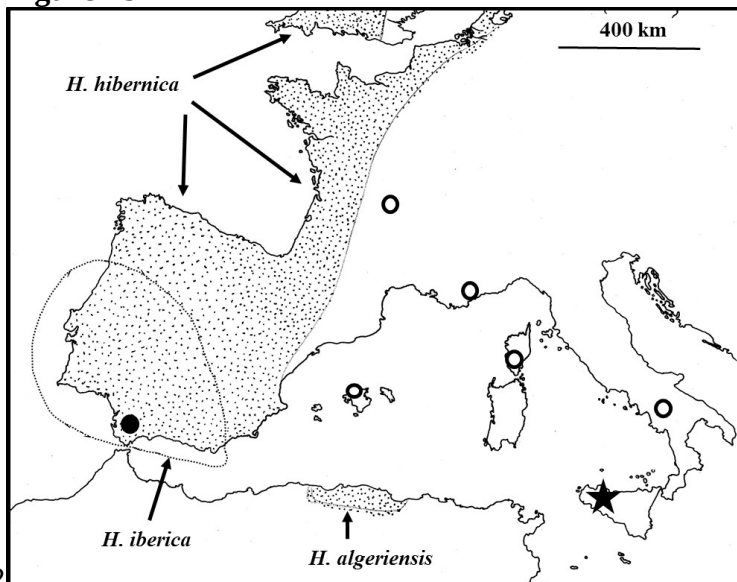

384 **Figure 1** – General outline of native distribution of ivies.

385 **1a** - Distribution of the 13 more commonly accepted species of *Hedera*. **1b** - Distribution

386 map of *H. iberica* (6x) and the two tetraploid ivies species (dotted): Atlantic western

387 European *H. hibernica* and endemic north Algerian *H. algeriensis*.

388 Studied populations: Southern Spain hexaploid population from Los Barrios (black dot);

389 diploid populations from France, Italy, Corsica and Mallorca (with dots); Sicilian tetraploid

390 populations of Alcama and Madonie (star).

391

392

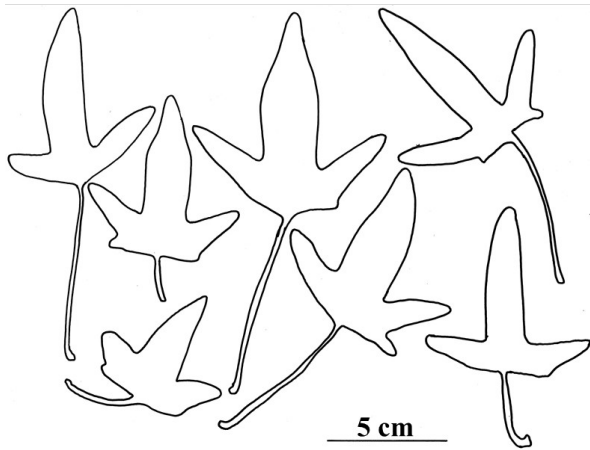

393

394 **Figure 2** – *Hedera iberica* leaves shape from los Barrios (Spain) population.

395

396

397 **Figure 4** - relationship between genome size (2C DNA) and ploidy level in the genus

398 *Hedera*.

399 **Continuous line:** estimated relationship ( $R^2=0.995$ ,  $P<2.2 \cdot 10^{-16}$ ) between genome size and ploidy level. **Dotted**

400 **lines:** mean confidence prediction for a probability level equal to 0.95. **Black dots:** 2C DNA values (in

401 picograms) for each plant analyzed. **Grey dots:** genomes size data from Zonnevald et al. (2005) and Green *et al.*

402 (2013).

403

404

405

406

407

408

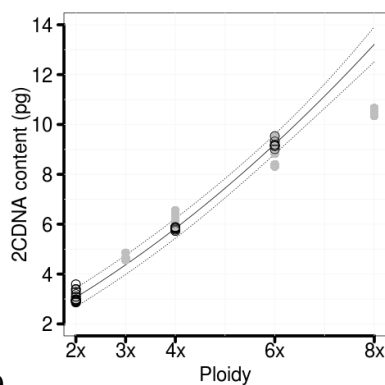

409

410

411

412 **Figure 3** - SEM of *Hedera* trichomes: a-b: Spain, Los Barrios (*H. maderensis* subsp. *iberica*); c-g

413 Sicily, Madonie and Alcamo (*H. hibernica*).

414

415

416

417

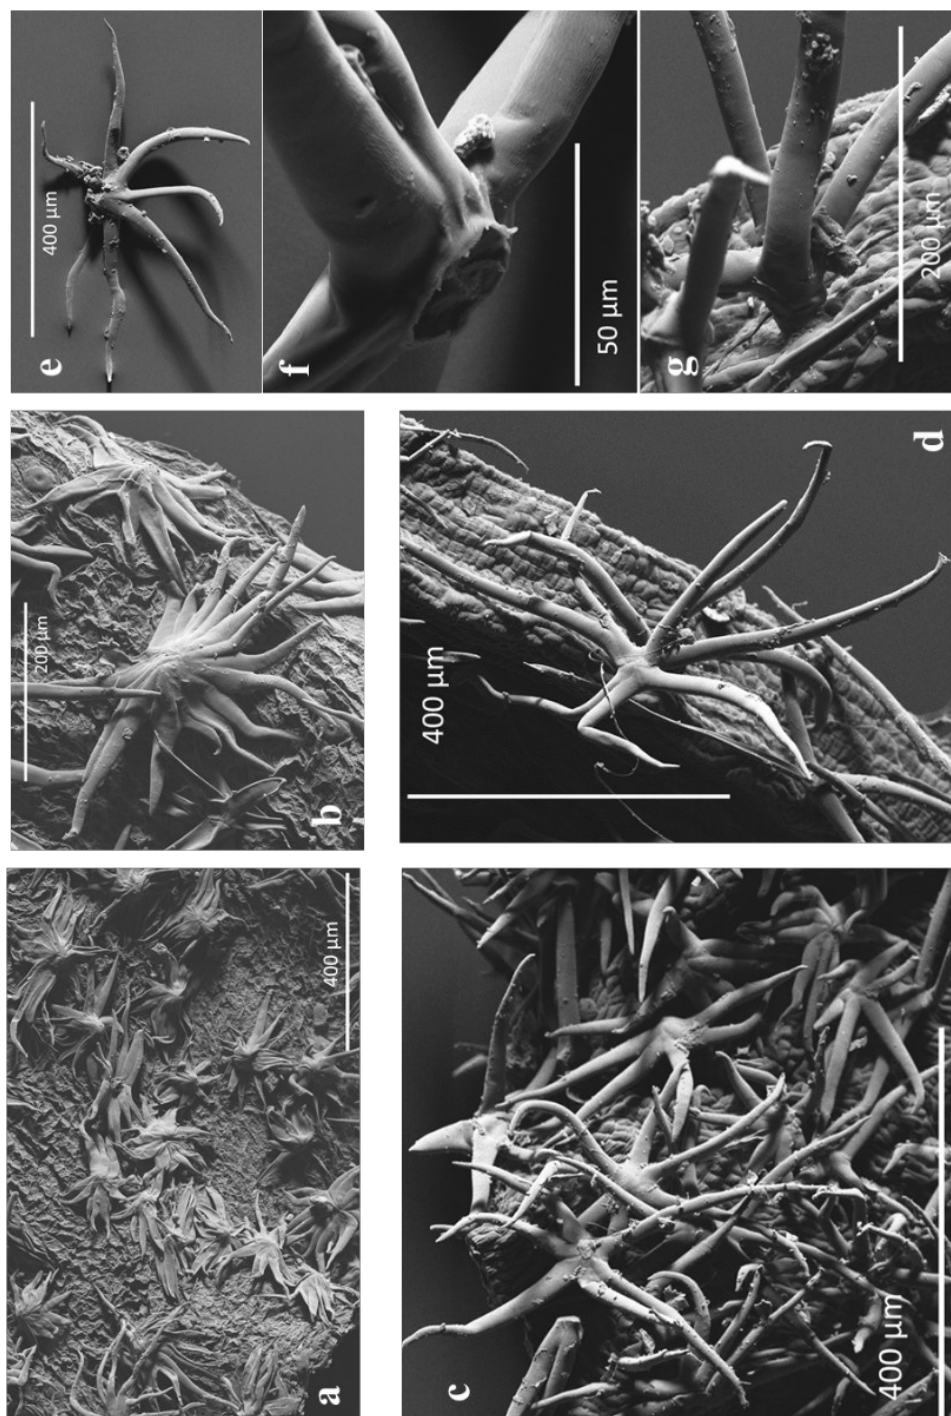

418
